# Supplementary material for: Restoration of Mecp2 expression in GABAergic neurons is sufficient to rescue multiple disease features in a mouse model of Rett syndrome
Source: eLife. 2016 Jun 21;5:e14198. doi: 10.7554/eLife.14198 (PMC4946897; doi:10.7554/eLife.14198)
Supplement: Supplementary file 1. — DOI: http://dx.doi.org/10.7554/eLife.14198.013 [file elife-14198-supp1.xlsx]

## Sheet: Sheet1
Figure	Experiment	Measured	Statistical Test	N = WT, Cre, Null/Het, Rescue	Comparison	Statistics (df, residual)	p Value
Figure 1C	Survival Curve	Age at death	Mantel-Cox	41, 37, 33,47	Genotype	Chi square = 172.8,	< 0.0001
						df = 3
Figure 2A	Rotarod	Latency to fall	Two-way repeated measures ANOVA	26, 24, 23, 28	Interaction	F (3,97) = 2.079	0.108
					Time	F (1,97) = 333.9	< 0.0001
					Genotype	F (3, 97) = 38.49	< 0.0001
					Subjects	F (97,97) = 7.226	< 0.0001
			Bonferroni's Multiple Comparison Test	Day 1	Mecp2lox-Stop/Y vs Wild-type		< 0.0001
					Viaat-Cre vs Wild-type		> 0.9999
					Rescue vs Wild-type		> 0.9999
					Viaat-Cre vs Mecp2lox-Stop/Y		< 0.0001
					Rescue vs Mecp2lox-Stop/Y		< 0.0001
					Rescue vs Viaat-Cre		0.263
				Day 2	Mecp2lox-Stop/Y vs Wild-type		< 0.0001
					Viaat-Cre vs Wild-type		> 0.9999
					Rescue vs Wild-type		> 0.9999
					Viaat-Cre vs Mecp2lox-Stop/Y		< 0.0001
					Rescue vs Mecp2lox-Stop/Y		< 0.0001
					Rescue vs Viaat-Cre		0.7509
Figure 2B	Grip Strength	Grip strength	One-way ANOVA	21 ,22, 20, 26	Genotype	F (3,85) = 16.11	< 0.0001
			Tukey's Multiple Comparison Test		Wild-type vs. Mecp2lox-Stop/Y		< 0.0001
					Wild-type vs. Viaat-Cre		0.9815
					Wild-type vs. Rescue		0.2538
					Mecp2lox-Stop/Y vs. Viaat-Cre		< 0.0001
					Mecp2lox-Stop/Y vs. Rescue		0.0003
					Viaat-Cre vs. Rescue		0.1235
Figure 2C	Open Field	Distance traveled	One-way ANOVA	13, 8, 11, 16	Genotype	F (3, 44) = 5.900	0.0018
			Tukey's Multiple Comparison Test		Wild-type vs. Mecp2lox-Stop/Y		0.0017
					Wild-type vs. Viaat-Cre		0.7257
					Wild-type vs. Rescue		0.0466
					Mecp2lox-Stop/Y vs. Viaat-Cre		0.0305
					Mecp2lox-Stop/Y vs. Rescue		0.3149
					Viaat-Cre vs. Rescue		0.4559
Figure 2D	Marble Burying	Number marbles buried	One-way ANOVA	15, 9, 11, 15	Genotype	F (3, 46) = 22.61	0.0001
			Tukey's Multiple Comparison Test		Wild-type vs. Mecp2lox-Stop/Y		< 0.0001
					Wild-type vs. Viaat-Cre		0.3653
					Wild-type vs. Rescue		0.0177
					Mecp2lox-Stop/Y vs. Viaat-Cre		< 0.0001
					Mecp2lox-Stop/Y vs. Rescue		< 0.0001
					Viaat-Cre vs. Rescue		0.636
Figure 2E	Nesting	Nesting Score	Two-way repeated measures ANOVA	25, 23, 23, 27	Interaction	F (3, 94) = 3.631	0.0157
					Time	F (1, 94) = 27.42	< 0.0001
					Genotype	F (3, 94) = 15.87	< 0.0001
					Subjects	F (94, 94) = 5.576	< 0.0001
			Bonferroni's Multiple Comparison Test	24 hours	Mecp2lox-Stop/Y vs Wild-type		< 0.0001
					Viaat-Cre vs Wild-type		> 0.9999
					Rescue vs Wild-type		> 0.9999
					Viaat-Cre vs Mecp2lox-Stop/Y		< 0.0001
					Rescue vs Mecp2lox-Stop/Y		< 0.0001
					Rescue vs Viaat-Cre		> 0.9999
				48 hours	Mecp2lox-Stop/Y vs Wild-type		0.0002
					Viaat-Cre vs Wild-type		> 0.9999
					Rescue vs Wild-type		> 0.9999
					Viaat-Cre vs Mecp2lox-Stop/Y		0.0045
					Rescue vs Mecp2lox-Stop/Y		0.0002
					Rescue vs Viaat-Cre		> 0.9999
Figure 2F	Partition	% Freezing Time	One-way ANOVA	25, 24, 19, 24	Genotype	F (3, 88) = 2.032	0.1152
			Tukey's Multiple Comparison Test		Wild-type vs. Mecp2lox-Stop/Y		0.1143
					Wild-type vs. Viaat-Cre		0.994
					Wild-type vs. Rescue		0.6762
					Mecp2lox-Stop/Y vs. Viaat-Cre		0.1937
					Mecp2lox-Stop/Y vs. Rescue		0.629
					Viaat-Cre vs. Rescue		0.8264
Figure 2G	Acoustic Startle Reflex	Maximum Startle Response	One-way ANOVA	18, 20, 16, 21	Genotype	F (3, 71) = 36.68	< 0.0001
			Tukey's Multiple Comparison Test		Wild-type vs. Mecp2lox-Stop/Y		< 0.0001
					Wild-type vs. Viaat-Cre		0.0011
					Wild-type vs. Rescue		< 0.0001
					Mecp2lox-Stop/Y vs. Viaat-Cre		< 0.0001
					Mecp2lox-Stop/Y vs. Rescue		> 0.9999
					Viaat-Cre vs. Rescue		< 0.0001
Figure 2H	Elevated Plus Maze	Duration in Open Arm	Two-way ANOVA	25, 24, 19, 24	Interaction	F (3, 176) = 9.278	< 0.0001
					Stage	F (1, 176) = 609.3	< 0.0001
					Genotype	F (3, 176) = 10.95	< 0.0001
			Bonferroni's Multiple Comparison Test	Habituation	Mecp2lox-Stop/Y vs Wild-type		> 0.9999
					Viaat-Cre vs Wild-type		> 0.9999
					Rescue vs Wild-type		> 0.9999
					Viaat-Cre vs Mecp2lox-Stop/Y		> 0.9999
					Rescue vs Mecp2lox-Stop/Y		> 0.9999
					Rescue vs Viaat-Cre		> 0.9999
				Tone	Mecp2lox-Stop/Y vs Wild-type		< 0.0001
					Viaat-Cre vs Wild-type		> 0.9999
					Rescue vs Wild-type		> 0.9999
					Viaat-Cre vs Mecp2lox-Stop/Y		< 0.0001
					Rescue vs Mecp2lox-Stop/Y		< 0.0001
					Rescue vs Viaat-Cre		0.7483
Figure 2I	Light Dark Box	Time Spent in Light	One-way ANOVA	24, 25, 21, 26	Genotype	F (3, 92) = 2.957	0.001
					Wild-type vs. Mecp2lox-Stop/Y		0.0104
					Wild-type vs. Viaat-Cre		>0.9999
					Wild-type vs. Rescue		0.9006
					Mecp2lox-Stop/Y vs. Viaat-Cre		0.0096
					Mecp2lox-Stop/Y vs. Rescue		0.001
					Viaat-Cre vs. Rescue		0.8962
Figure 3B	Open Field	Distance traveled	One-way ANOVA	25, 25, 20	Genotype	F (2, 67) = 5.975	0.0041
			Tukey's Multiple Comparison Test		Wild-type vs Viaat-Cre		0.6956
					Wild-type vs Rescue		0.0038
					Viaat-Cre vs Rescue		0.032
Figure 3C	Rotarod	Latency to fall	Two-way repeated measures ANOVA	25, 25, 20	Interaction	F (2, 67) = 6.374	0.0029
					Time	F (1, 67) = 75.00	< 0.0001
					Genotype	F (2, 67) = 6.346	0.003
					Subjects	F (67, 67) = 6.529	< 0.0001
			Bonferroni's Multiple Comparison Test		Wild-type vs Viaat-Cre		0.0053
					Wild-type vs Rescue		> 0.9999
					Viaat-Cre vs Rescue		0.014
					Wild-type vs Viaat-Cre		> 0.9999
					Wild-type vs Rescue		0.1971
					Viaat-Cre vs Rescue		0.0078
Figure 3D	Grip Strength	Grip strength	One-way ANOVA	25, 25, 20	Genotype	F (2, 67) = 7.988	0.0008
			Tukey's Multiple Comparison Test		Wild-type vs Viaat-Cre		0.0714
					Wild-type vs Rescue		0.1582
					Viaat-Cre vs Rescue		0.0005
Figure 4A	GABA analysis	GABA concentration of striatum	Student's t-test	5, 4, 4, 4	Wild-type vs. Mecp2lox-Stop/Y		0.0061
					Wild-type vs. Viaat-Cre		0.6687
					Wild-type vs. Rescue		0.7556
					Mecp2lox-Stop/Y vs. Viaat-Cre		0..1335
					Mecp2lox-Stop/Y vs. Rescue		0.0094
					Viaat-Cre vs. Rescue		0..5886
Figure 4B	qPCR analysis - ΔCt normalized to GAPDH	gad1	One-way ANOVA	7, 6, 7, 7	Genotype	F (3, 23) = 13.93	< 0.0001
			Tukey's Multiple Comparison Test		Wild-type vs Viaat-Cre		> 0.9999
					Wild-type vs Mecp2lox-Stop/Y		0.0008
					Wild-type vs Rescue		0.394
					Viaat-Cre vs Mecp2lox-Stop/Y		0.0012
					Viaat-Cre vs Rescue		0.4339
					Mecp2lox-Stop/Y vs Rescue		< 0.0001
		gad2	One-way ANOVA	7, 6, 7, 7	Genotype	F (3, 23) = 5.543	0.0052
			Tukey's Multiple Comparison Test		Wild-type vs Viaat-Cre		0.5382
					Wild-type vs Mecp2lox-Stop/Y		0.1725
					Wild-type vs Rescue		0.4771
					Viaat-Cre vs Mecp2lox-Stop/Y		0.0121
					Viaat-Cre vs Rescue		> 0.9999
					Mecp2lox-Stop/Y vs Rescue		0.0078
		vgat	One-way ANOVA	7, 6, 7, 7	Genotype	F (3, 23) = 9.165	0.0004
			Tukey's Multiple Comparison Test		Wild-type vs Viaat-Cre		0.1492
					Wild-type vs Mecp2lox-Stop/Y		0.984
					Wild-type vs Rescue		0.0017
					Viaat-Cre vs Mecp2lox-Stop/Y		0.0772
					Viaat-Cre vs Rescue		0.2736
					Mecp2lox-Stop/Y vs Rescue		0.0007
		pv	One-way ANOVA	7, 6, 7, 7	Genotype	F (3, 23) = 4.392	0.0139
			Tukey's Multiple Comparison Test		Wild-type vs Viaat-Cre		0.2396
					Wild-type vs Mecp2lox-Stop/Y		0.0076
					Wild-type vs Rescue		0.1654
					Viaat-Cre vs Mecp2lox-Stop/Y		0.4405
					Viaat-Cre vs Rescue		0.9991
					Mecp2lox-Stop/Y vs Rescue		0.4838
		gephrin	One-way ANOVA	7, 6, 7, 7	Genotype	F (3, 23) = 0.1448	0.932
			Tukey's Multiple Comparison Test		Wild-type vs Viaat-Cre		0.9702
					Wild-type vs Mecp2lox-Stop/Y		> 0.9999
					Wild-type vs Rescue		0.9679
					Viaat-Cre vs Mecp2lox-Stop/Y		0.964
					Viaat-Cre vs Rescue		> 0.9999
					Mecp2lox-Stop/Y vs Rescue		0.9611
		kv3.1	One-way ANOVA	7, 6, 7, 7	Genotype	F (3, 23) = 1.272	0.3073
			Tukey's Multiple Comparison Test		Wild-type vs Viaat-Cre		0.425
					Wild-type vs Mecp2lox-Stop/Y		0.4467
					Wild-type vs Rescue		0.3596
					Viaat-Cre vs Mecp2lox-Stop/Y		0.9997
					Viaat-Cre vs Rescue		> 0.9999
					Mecp2lox-Stop/Y vs Rescue		0.9985
		gabra1	One-way ANOVA	7, 6, 7, 7	Genotype	F (3, 23) = 3.420	0.0342
			Tukey's Multiple Comparison Test		Wild-type vs Viaat-Cre		0.241
					Wild-type vs Mecp2lox-Stop/Y		0.041
					Wild-type vs Rescue		0.0617
					Viaat-Cre vs Mecp2lox-Stop/Y		0.8484
					Viaat-Cre vs Rescue		0.9227
					Mecp2lox-Stop/Y vs Rescue		0.9974
		vglut1	One-way ANOVA	7, 6, 7, 7	Genotype	F (3, 23) = 1.739	0.1871
			Tukey's Multiple Comparison Test		Wild-type vs Viaat-Cre		0.959
					Wild-type vs Mecp2lox-Stop/Y		0.4069
					Wild-type vs Rescue		0.9934
					Viaat-Cre vs Mecp2lox-Stop/Y		0.2104
					Viaat-Cre vs Rescue		0.9948
					Mecp2lox-Stop/Y vs Rescue		0.2778
Figure 4C	qPCR analysis - ΔCt normalized to GAPDH	nxph4	One-way ANOVA	7, 6, 7, 7	Genotype	F (3, 23) = 11.82	< 0.0001
			Tukey's Multiple Comparison Test		Wild-type vs Viaat-Cre		0.9981
					Wild-type vs Mecp2lox-Stop/Y		0.0004
					Wild-type vs Rescue		0.9905
					Viaat-Cre vs Mecp2lox-Stop/Y		0.001
					Viaat-Cre vs Rescue		0.9669
					Mecp2lox-Stop/Y vs Rescue		0.0002
		gabra3	One-way ANOVA	7, 6, 7, 7	Genotype	F (3, 23) = 17.73	< 0.0001
			Tukey's Multiple Comparison Test		Wild-type vs Viaat-Cre		0.2037
					Wild-type vs Mecp2lox-Stop/Y		0.0003
					Wild-type vs Rescue		0.9821
					Viaat-Cre vs Mecp2lox-Stop/Y		< 0.0001
					Viaat-Cre vs Rescue		0.3559
					Mecp2lox-Stop/Y vs Rescue		0.0001
		kcng4	One-way ANOVA	7, 6, 7, 7	Genotype	F (3, 23) = 19.05	< 0.0001
			Tukey's Multiple Comparison Test		Wild-type vs Viaat-Cre		0.9984
					Wild-type vs Mecp2lox-Stop/Y		< 0.0001
					Wild-type vs Rescue		0.6082
					Viaat-Cre vs Mecp2lox-Stop/Y		< 0.0001
					Viaat-Cre vs Rescue		0.7356
					Mecp2lox-Stop/Y vs Rescue		< 0.0001
		opn3	One-way ANOVA	7, 6, 7, 7	Genotype	F (3, 23) = 10.79	0.0001
			Tukey's Multiple Comparison Test		Wild-type vs Viaat-Cre		0.1361
					Wild-type vs Mecp2lox-Stop/Y		0.0454
					Wild-type vs Rescue		0.2284
					Viaat-Cre vs Mecp2lox-Stop/Y		0.0003
					Viaat-Cre vs Rescue		0.982
					Mecp2lox-Stop/Y vs Rescue		0.0004
		scg2	One-way ANOVA	7, 6, 7, 7	Genotype	F (3, 23) = 16.24	< 0.0001
			Tukey's Multiple Comparison Test		Wild-type vs Viaat-Cre		> 0.9999
					Wild-type vs Mecp2lox-Stop/Y		< 0.0001
					Wild-type vs Rescue		0.0551
					Viaat-Cre vs Mecp2lox-Stop/Y		< 0.0001
					Viaat-Cre vs Rescue		0.0698
					Mecp2lox-Stop/Y vs Rescue		0.013
		A1593442	One-way ANOVA	7, 6, 7, 7	Genotype	F (3, 23) = 17.12	< 0.0001
			Tukey's Multiple Comparison Test		Wild-type vs Viaat-Cre		0.7344
					Wild-type vs Mecp2lox-Stop/Y		< 0.0001
					Wild-type vs Rescue		0.5157
					Viaat-Cre vs Mecp2lox-Stop/Y		0.0001
					Viaat-Cre vs Rescue		0.9894
					Mecp2lox-Stop/Y vs Rescue		0.0002
		robo2	One-way ANOVA	7, 6, 7, 7	Genotype	F (3, 23) = 3.463	0.0328
			Tukey's Multiple Comparison Test		Wild-type vs Viaat-Cre		0.992
					Wild-type vs Mecp2lox-Stop/Y		0.0366
					Wild-type vs Rescue		0.905
					Viaat-Cre vs Mecp2lox-Stop/Y		0.0835
					Viaat-Cre vs Rescue		0.9824
					Mecp2lox-Stop/Y vs Rescue		0.1431
		rassf8	One-way ANOVA	7, 6, 7, 7	Genotype	F (3, 23) = 9.667	0.0003
			Tukey's Multiple Comparison Test		Wild-type vs Viaat-Cre		0.9895
					Wild-type vs Mecp2lox-Stop/Y		0.0004
					Wild-type vs Rescue		0.2004
					Viaat-Cre vs Mecp2lox-Stop/Y		0.0012
					Viaat-Cre vs Rescue		0.3677
					Mecp2lox-Stop/Y vs Rescue		0.0458
		cirbp	One-way ANOVA	7, 6, 7, 7	Genotype	F (3, 23) = 0.8687	0.4715
			Tukey's Multiple Comparison Test		Wild-type vs Viaat-Cre		0.9981
					Wild-type vs Mecp2lox-Stop/Y		0.467
					Wild-type vs Rescue		0.8736
					Viaat-Cre vs Mecp2lox-Stop/Y		0.6048
					Viaat-Cre vs Rescue		0.9448
					Mecp2lox-Stop/Y vs Rescue		0.8874
		cabp7	One-way ANOVA	7, 6, 7, 7	Genotype	F (3, 23) = 17.82	< 0.0001
			Tukey's Multiple Comparison Test		Wild-type vs Viaat-Cre		> 0.9999
					Wild-type vs Mecp2lox-Stop/Y		< 0.0001
					Wild-type vs Rescue		0.4216
					Viaat-Cre vs Mecp2lox-Stop/Y		< 0.0001
					Viaat-Cre vs Rescue		0.4278
					Mecp2lox-Stop/Y vs Rescue		0.0004
Figure 5A	mIPSC	Frequency	One-way ANOVA	Animal n: 3, 3, 3, 3	Genotype	F (3,49) = 2.613	0.0617
			Tukey's Multiple Comparison Test	Cell n: 11, 17, 14, 11	Wild-type vs. Mecp2lox-Stop/Y		0.8825
					Wild-type vs. Viaat-Cre		0.8364
					Wild-type vs. Rescue		0.4053
					Mecp2lox-Stop/Y vs. Viaat-Cre		0.9998
					Mecp2lox-Stop/Y vs. Rescue		0.0912
					Viaat-Cre vs. Rescue		0.0622
		Amplitude	One-way ANOVA	Animal n: 3, 3, 3, 3	Genotype	F (3,49) = 1.651	0.1898
			Tukey's Multiple Comparison Test	Cell n: 11, 17, 14, 11	Wild-type vs. Mecp2lox-Stop/Y		>0.9999
					Wild-type vs. Viaat-Cre		0.6191
					Wild-type vs. Rescue		0.3349
					Mecp2lox-Stop/Y vs. Viaat-Cre		0.5205
					Mecp2lox-Stop/Y vs. Rescue		0.2577
					Viaat-Cre vs. Rescue		0.913
		Decay	One-way ANOVA	Animal n: 3, 3, 3, 3	Genotype	F (3,49) = 2.305	0.0884
			Tukey's Multiple Comparison Test	Cell n: 11, 17, 14, 11	Wild-type vs. Mecp2lox-Stop/Y		0.9448
					Wild-type vs. Viaat-Cre		0.9571
					Wild-type vs. Rescue		0.3488
					Mecp2lox-Stop/Y vs. Viaat-Cre		0.9998
					Mecp2lox-Stop/Y vs. Rescue		0.1062
					Viaat-Cre vs. Rescue		0.1007
		Charge	One-way ANOVA	Animal n: 3, 3, 3, 3	Genotype	F (3,49) = 0.1526	0.9275
			Tukey's Multiple Comparison Test	Cell n: 11, 17, 14, 11	Wild-type vs. Mecp2lox-Stop/Y		>0.9999
					Wild-type vs. Viaat-Cre		0.9368
					Wild-type vs. Rescue		0.9968
					Mecp2lox-Stop/Y vs. Viaat-Cre		0.9445
					Mecp2lox-Stop/Y vs. Rescue		0.9986
					Viaat-Cre vs. Rescue		0.9845
Figure 5B	mEPSC	Frequency	One-way ANOVA	Animal n: 3, 3, 3, 3	Genotype	F (3,64) = 2.842	0.0447
			Tukey's Multiple Comparison Test	Cell n: 17, 16, 18, 17	Wild-type vs. Mecp2lox-Stop/Y		0.139
					Wild-type vs. Viaat-Cre		0.9896
					Wild-type vs. Rescue		0.1184
					Mecp2lox-Stop/Y vs. Viaat-Cre		0.2666
					Mecp2lox-Stop/Y vs. Rescue		0.9995
					Viaat-Cre vs. Rescue		0.2316
		Amplitude	One-way ANOVA	Animal n: 3, 3, 3, 3	Genotype	F (3,64) = 3.654	0.017
			Tukey's Multiple Comparison Test	Cell n: 17, 16, 18, 17	Wild-type vs. Mecp2lox-Stop/Y		0.3918
					Wild-type vs. Viaat-Cre		0.9632
					Wild-type vs. Rescue		0.0788
					Mecp2lox-Stop/Y vs. Viaat-Cre		0.1804
					Mecp2lox-Stop/Y vs. Rescue		0.8099
					Viaat-Cre vs. Rescue		0.0265
		Decay	One-way ANOVA	Animal n: 3, 3, 3, 3	Genotype	F (3,64) = 0.2862	0.8352
			Tukey's Multiple Comparison Test	Cell n: 17, 16, 18, 17	Wild-type vs. Mecp2lox-Stop/Y		0.7975
					Wild-type vs. Viaat-Cre		0.9841
					Wild-type vs. Rescue		0.955
					Mecp2lox-Stop/Y vs. Viaat-Cre		0.9498
					Mecp2lox-Stop/Y vs. Rescue		0.9796
					Viaat-Cre vs. Rescue		0.9988
		Charge	One-way ANOVA	Animal n: 3, 3, 3, 3	Genotype	F (3,64) = 0.8846	0.4539
			Tukey's Multiple Comparison Test	Cell n: 17, 16, 18, 17	Wild-type vs. Mecp2lox-Stop/Y		0.6831
					Wild-type vs. Viaat-Cre		0.9879
					Wild-type vs. Rescue		0.9682
					Mecp2lox-Stop/Y vs. Viaat-Cre		0.87
					Mecp2lox-Stop/Y vs. Rescue		0.3999
					Viaat-Cre vs. Rescue		0.8654
Figure 5 - figure supplement 1A	Vgat+ synpatic puncta	Puncta number	One-way ANOVA	Animal n: 2, 2, 2, 2	Genotype	F (3, 41) = 3.995	0.0139
			Tukey's Multiple Comparison Test		Wild-type vs. Mecp2-/Y		0.2805
					Wild-type vs. Viaat-Cre		0.4862
					Wild-type vs. Rescue		0.7734
					Mecp2-/Y vs. Viaat-Cre		0.017
					Mecp2-/Y vs. Rescue		0.0397
					Viaat-Cre vs. Rescue		0.9471
	Vglut1+ synaptic puncta	Puncta number	One-way ANOVA	Animal n: 2, 2, 2, 2	Genotype	F (3, 40) = 2.612	0.0645
			Tukey's Multiple Comparison Test		Wild-type vs. Mecp2-/Y		0.866
					Wild-type vs. Viaat-Cre		>0.9999
					Wild-type vs. Rescue		0.212
					Mecp2-/Y vs. Viaat-Cre		0.8908
					Mecp2-/Y vs. Rescue		0.0603
					Viaat-Cre vs. Rescue		0.1894
Figure 5 - figure supplement 1B	Spontaneous Action Potentials	Frequency	One-way ANOVA	Animal n: 3, 3, 4, 3	Genotype	F (3,60) = 4.573	0.006
			Tukey's Multiple Comparison Test	Cell n: 15, 12, 20, 17	Wild-type vs. Mecp2-/Y		0.0365
					Wild-type vs. Viaat-Cre		0.9996
					Wild-type vs. Rescue		0.9871
					Mecp2-/Y vs. Viaat-Cre		0.0214
					Mecp2-/Y vs. Rescue		0.0232
					Viaat-Cre vs. Rescue		0.9945
Figure 5 - figure supplement 1C	Intrinsic Excitability	Slope	One-way ANOVA	Animal n: 3, 3, 4, 3	Genotype	F (3,48) = 0.3276	0.8054
			Tukey's Multiple Comparison Test	Cell n: 15, 12, 20, 17	Wild-type vs. Mecp2-/Y		0.8065
					Wild-type vs. Viaat-Cre		0.8866
					Wild-type vs. Rescue		0.9904
					Mecp2-/Y vs. Viaat-Cre		0.996
					Mecp2-/Y vs. Rescue		0.9279
					Viaat-Cre vs. Rescue		0.9744
Figure 6C	Rotarod	Latency to fall	Two-way repeated measures ANOVA	16, 14, 16, 15	Interaction	F (3, 57) = 1.651	0.1878
					Time	F (1, 57) = 62.56	0.0001
					Genotype	F (3, 57) = 6.982	0.0004
					Subjects	F (57, 57) = 9.141	0.0001
			Bonferroni's Multiple Comparison Test	Day 1	Mecp2lox-Stop/+ vs Wild-type		0.1189
					Viaat-Cre vs Wild-type		> 0.9999
					Rescue vs Wild-type		> 0.9999
					Viaat-Cre vs Mecp2lox-Stop/+		0.0022
					Rescue vs Mecp2lox-Stop/+		0.083
					Rescue vs Viaat-Cre		> 0.9999
				Day 2	Mecp2lox-Stop/+ vs Wild-type		0.0176
					Viaat-Cre vs Wild-type		> 0.9999
					Rescue vs Wild-type		> 0.9999
					Viaat-Cre vs Mecp2lox-Stop/+		0.0002
					Rescue vs Mecp2lox-Stop/+		0.3358
					Rescue vs Viaat-Cre		0.2506
Figure 6D	Acoustic Startle Reflex	Maximum Startle Response	One-way ANOVA	16, 16, 17, 14	Genotype	F (3, 59) = 34.60	0.0001
			Tukey's Multiple Comparison Test		Mecp2lox-Stop/+ vs Wild-type		< 0.0001
					Viaat-Cre vs Wild-type		0.2695
					Rescue vs Wild-type		< 0.0001
					Viaat-Cre vs Mecp2lox-Stop/+		< 0.0001
					Rescue vs Mecp2lox-Stop/+		0.7519
					Rescue vs Viaat-Cre		< 0.0001
Figure 6E	Grip Strength	Grip strength	One-way ANOVA	16, 16, 18, 14	Genotype	F (3, 60) = 6.974	0.0004
			Tukey's Multiple Comparison Test		Mecp2lox-Stop/+ vs Wild-type		0.0055
					Viaat-Cre vs Wild-type		0.8593
					Rescue vs Wild-type		0.6785
					Viaat-Cre vs Mecp2lox-Stop/+		0.0004
					Rescue vs Mecp2lox-Stop/+		0.1411
					Rescue vs Viaat-Cre		0.2465
Figure 6F	Partition	Interaction Time	Two-way repeated measures ANOVA	16, 16, 18, 13	Interaction	F (6, 118) = 1.951	0.0782
					Time	F (2, 118) = 146.2	0.0001
					Genotype	F (3, 59) = 5.779	0.0016
					Subjects	F (59, 118) = 2.590	0.0001
			Bonferroni's Multiple Comparison Test	Familiar 1	Mecp2lox-Stop/+ vs Wild-type		> 0.9999
					Viaat-Cre vs Wild-type		> 0.9999
					Rescue vs Wild-type		> 0.9999
					Viaat-Cre vs Mecp2lox-Stop/+		> 0.9999
					Rescue vs Mecp2lox-Stop/+		> 0.9999
					Rescue vs Viaat-Cre		> 0.9999
				Novel	Mecp2lox-Stop/+ vs Wild-type		0.0008
					Viaat-Cre vs Wild-type		> 0.9999
					Rescue vs Wild-type		> 0.9999
					Viaat-Cre vs Mecp2lox-Stop/+		0.0016
					Rescue vs Mecp2lox-Stop/+		0.0031
					Rescue vs Viaat-Cre		> 0.9999
				Familiar 2	Mecp2lox-Stop/+ vs Wild-type		0.3365
					Viaat-Cre vs Wild-type		> 0.9999
					Rescue vs Wild-type		> 0.9999
					Viaat-Cre vs Mecp2lox-Stop/+		> 0.9999
					Rescue vs Mecp2lox-Stop/+		0.4148
					Rescue vs Viaat-Cre		> 0.9999
Figure 6G	Nesting	Nesting Score	Two-way repeated measures ANOVA	16, 16, 17, 14	Interaction	F (3, 59) = 7.833	0.0002
					Time	F (1, 59) = 7.416	0.0085
					Genotype	F (3, 59) = 7.833	0.0002
					Subjects	F (59, 59) = 1.000	0.5
			Bonferroni's Multiple Comparison Test	24 hours	Mecp2lox-Stop/+ vs Wild-type		< 0.0001
					Viaat-Cre vs Wild-type		> 0.9999
					Rescue vs Wild-type		> 0.9999
					Viaat-Cre vs Mecp2lox-Stop/+		< 0.0001
					Rescue vs Mecp2lox-Stop/+		< 0.0001
					Rescue vs Viaat-Cre		> 0.9999
				48 hours	Mecp2lox-Stop/+ vs Wild-type		> 0.9999
					Viaat-Cre vs Wild-type		> 0.9999
					Rescue vs Wild-type		> 0.9999
					Viaat-Cre vs Mecp2lox-Stop/+		> 0.9999
					Rescue vs Mecp2lox-Stop/+		> 0.9999
					Rescue vs Viaat-Cre		> 0.9999
Figure 6H	Open Field	Distance traveled	One-way ANOVA	31, 28, 25, 20	Genotype	F (3, 100) = 8.381	< 0.0001
			Tukey's Multiple Comparison Test		Mecp2lox-Stop/+ vs Wild-type		< 0.0001
					Viaat-Cre vs Wild-type		0.0388
					Rescue vs Wild-type		0.0902
					Viaat-Cre vs Mecp2lox-Stop/+		0.1039
					Rescue vs Mecp2lox-Stop/+		0.1283
					Rescue vs Viaat-Cre		0.9997
Figure 6I	Rotarod	Latency to fall	Two-way repeated measures ANOVA	35, 30, 28, 25	Interaction	F (3, 114) = 3.093	0.0298
					Time	F (1, 114) = 76.67	< 0.0001
					Genotype	F (3, 114) = 15.77	< 0.0001
					Subjects	F (114, 114) = 6.481	< 0.0001
			Bonferroni's Multiple Comparison Test	Day 1	Mecp2lox-Stop/+ vs Wild-type		0.0003
					Viaat-Cre vs Wild-type		> 0.9999
					Rescue vs Wild-type		0.9348
					Viaat-Cre vs Mecp2lox-Stop/+		< 0.0001
					Rescue vs Mecp2lox-Stop/+		0.296
					Rescue vs Viaat-Cre		0.1805
				Day 2	Mecp2lox-Stop/+ vs Wild-type		< 0.0001
					Viaat-Cre vs Wild-type		0.9801
					Rescue vs Wild-type		0.1504
					Viaat-Cre vs Mecp2lox-Stop/+		< 0.0001
					Rescue vs Mecp2lox-Stop/+		0.0944
					Rescue vs Viaat-Cre		0.0009
Figure 6J	Parallel Rod Footslip	Total Footfalls/Total Distance Traveled	One-way ANOVA	34, 29, 27, 24	Genotype	F (3, 109) = 9.193	< 0.0001
			Tukey's Multiple Comparison Test		Mecp2lox-Stop/+ vs Wild-type		< 0.0001
					Viaat-Cre vs Wild-type		0.9668
					Rescue vs Wild-type		0.1795
					Viaat-Cre vs Mecp2lox-Stop/+		0.0003
					Rescue vs Mecp2lox-Stop/+		0.0614
					Rescue vs Viaat-Cre		0.4228
Figure 6K	Grip Strength	Grip strength	One-way ANOVA	35, 30, 29, 25	Genotype	F (3, 114) = 11.63	0.0001
			Tukey's Multiple Comparison Test		Mecp2lox-Stop/+ vs Wild-type		< 0.0001
					Viaat-Cre vs Wild-type		0.9953
					Rescue vs Wild-type		0.106
					Viaat-Cre vs Mecp2lox-Stop/+		< 0.0001
					Rescue vs Mecp2lox-Stop/+		0.0662
					Rescue vs Viaat-Cre		0.0766
Figure 6 – figure supplement 1A	Open Field	Distance traveled	One-way ANOVA	16, 17, 17, 11	Genotype	F (3, 57) = 1.487	0.2278
			Tukey's Multiple Comparison Test		Mecp2lox-Stop/+ vs Wild-type		0.959
					Viaat-Cre vs Wild-type		0.5338
					Rescue vs Wild-type		0.9703
					Viaat-Cre vs Mecp2lox-Stop/+		0.248
					Rescue vs Mecp2lox-Stop/+		> 0.9999
					Rescue vs Viaat-Cre		0.3497
Figure 6 – figure supplement 1B	Open Field	Distance traveled	One-way ANOVA	18, 13, 11, 8	Genotype	F (3, 46) = 1.901	0.1427
			Tukey's Multiple Comparison Test		Mecp2lox-Stop/+ vs Wild-type		0.2544
					Viaat-Cre vs Wild-type		0.5109
					Rescue vs Wild-type		0.9818
					Viaat-Cre vs Mecp2lox-Stop/+		0.9559
					Rescue vs Mecp2lox-Stop/+		0.2489
					Rescue vs Viaat-Cre		0.4565
Figure 6 – figure supplement 1C	Parallel Rod Footslip	Total Footfalls/Total Distance Traveled	One-way ANOVA	18, 13, 11, 8	Genotype	F (3, 46) = 3.531	0.0219
			Tukey's Multiple Comparison Test		Mecp2lox-Stop/+ vs Wild-type		0.0249
					Viaat-Cre vs Wild-type		0.9998
					Rescue vs Wild-type		0.8951
					Viaat-Cre vs Mecp2lox-Stop/+		0.0334
					Rescue vs Mecp2lox-Stop/+		0.2933
					Rescue vs Viaat-Cre		0.8824
Figure 6 – figure supplement 1D	Open Field	Distance traveled	One-way ANOVA	16, 16, 17, 14	Genotype	F (3, 59) = 0.4075	0.7481
			Tukey's Multiple Comparison Test		Mecp2lox-Stop/+ vs Wild-type		0.9908
					Viaat-Cre vs Wild-type		0.8727
					Rescue vs Wild-type		0.9935
					Viaat-Cre vs Mecp2lox-Stop/+		0.7111
					Rescue vs Mecp2lox-Stop/+		0.9452
					Rescue vs Viaat-Cre		0.9655
Figure 6 – figure supplement 1E	Dowel Walk	Latency to Fall	One-way ANOVA	16, 16, 18, 14	Genotype	F (3, 60) = 5.457	0.0022
			Tukey's Multiple Comparison Test		Mecp2lox-Stop/+ vs Wild-type		0.0066
					Viaat-Cre vs Wild-type		> 0.9999
					Rescue vs Wild-type		0.281
					Viaat-Cre vs Mecp2lox-Stop/+		0.0063
					Rescue vs Mecp2lox-Stop/+		0.494
					Rescue vs Viaat-Cre		0.2738
Figure 6 – figure supplement 1F	Dowel Walk	Latency to Fall	One-way ANOVA	35, 31, 28, 25	Genotype	F (3, 114) = 11.23	< 0.0001
			Tukey's Multiple Comparison Test		Mecp2lox-Stop/+ vs Wild-type		< 0.0001
					Viaat-Cre vs Wild-type		0.9976
					Rescue vs Wild-type		0.0123
					Viaat-Cre vs Mecp2lox-Stop/+		< 0.0001
					Rescue vs Mecp2lox-Stop/+		0.3663
					Rescue vs Viaat-Cre		0.0272
